# Supplementary material for: A rare intercomparison of nutrient analysis at sea: lessons learned and recommendations to enhance comparability of open-ocean nutrient data
Source: Copernicus journal article supplement (doi:10.5194/essd-11-355-2019), 2019-03-11
Supplement: Supplementary file 1 [file essd-11-355-2019-supplement.pdf]

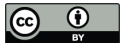

## *Supplement of*

# **A rare intercomparison of nutrient analysis at sea: lessons learned and recommendations to enhance comparability of open-ocean nutrient data**

**Triona McGrath et al.**

*Correspondence to:* Triona McGrath ([triona\\_mcgrath@hotmail.com](mailto:triona_mcgrath@hotmail.com), [triona.mcgrath@marine.ie](mailto:triona.mcgrath@marine.ie))  
and Evin McGovern ([evin.mcGovern@marine.ie](mailto:evin.mcGovern@marine.ie))

The copyright of individual parts of the supplement might differ from the CC BY 4.0 License.

Table S1. Details of primary and secondary stock solutions to make calibration standards.

| <b>Standard</b>                 | <b>Sodium Nitrate</b>  | <b>Sodium Nitrite</b>  | <b>Sodium Metasilicate</b>       | <b>Potassium Dihydrogen Phosphate</b> | <b>Solution</b>                                                                                             |
|---------------------------------|------------------------|------------------------|----------------------------------|---------------------------------------|-------------------------------------------------------------------------------------------------------------|
| 1° stock<br><b>MI</b>           | 0.85 g L <sup>-1</sup> | 0.69 g L <sup>-1</sup> | 2.84 g L <sup>-1</sup>           | 1.36 g L <sup>-1</sup>                | Diluted to 1L with Ultrapure water<br>Stored for 1 month                                                    |
| <b>Standard</b>                 | <b>Sodium Nitrate</b>  | <b>Sodium Nitrite</b>  | <b>Sodium hexafluorosilicate</b> | <b>Potassium Dihydrogen Phosphate</b> | <b>Solution</b>                                                                                             |
| 1° stock<br><b>Dal</b>          | 0.85 g L <sup>-1</sup> | 0.69 g/L               | 1.88 g/L                         | 1.36 g L <sup>-1</sup>                | Diluted to 1L with Ultrapure water<br>Stored for 1 month                                                    |
| 2° stock<br><b>MI &amp; Dal</b> | 10 mL                  | 1 mL                   | 10 mL                            | 1 mL                                  | Made from 1° stock. Diluted to 100 ml with Ultrapure water (MI) or NaCl solution (Dal)<br>Stored for 1 week |

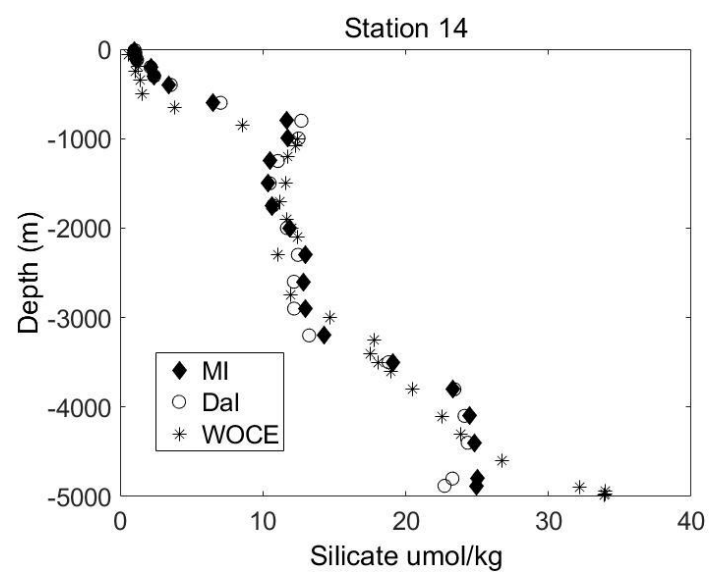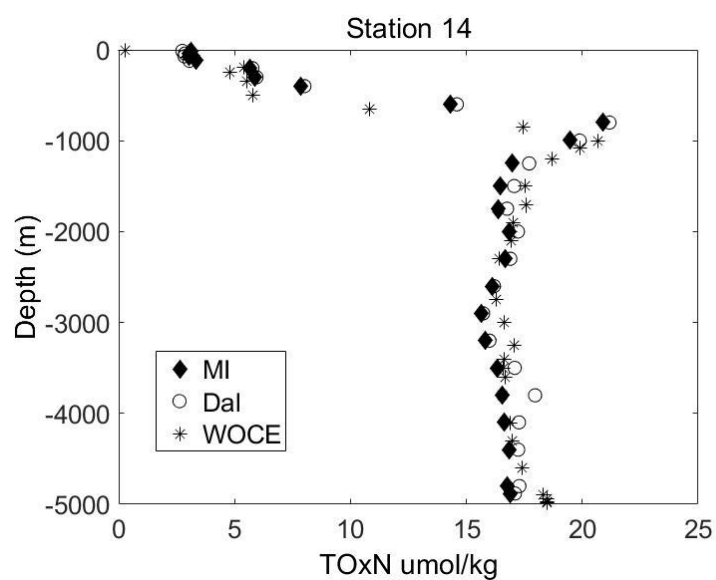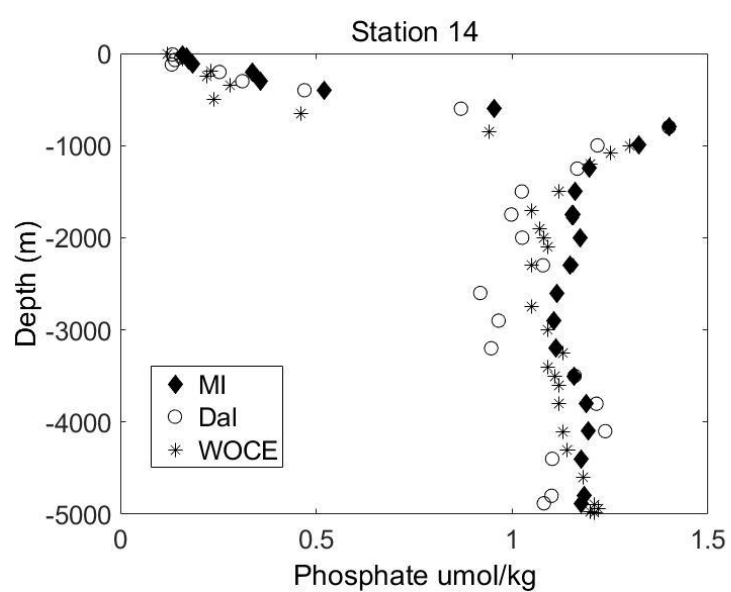

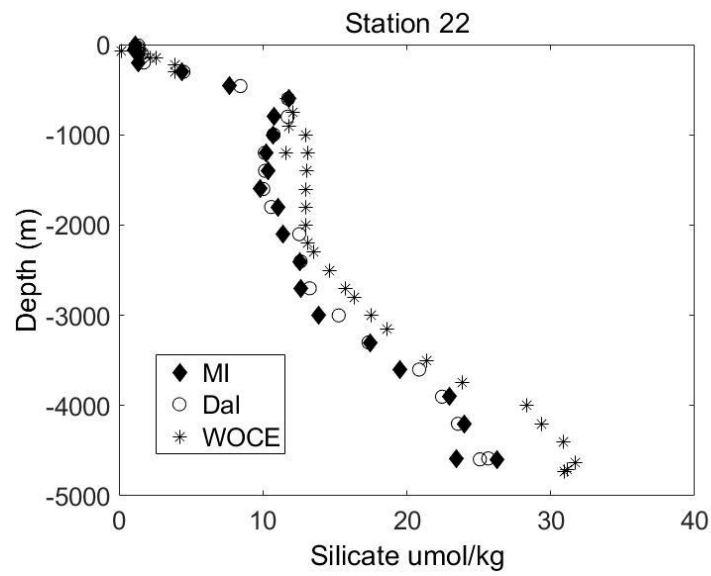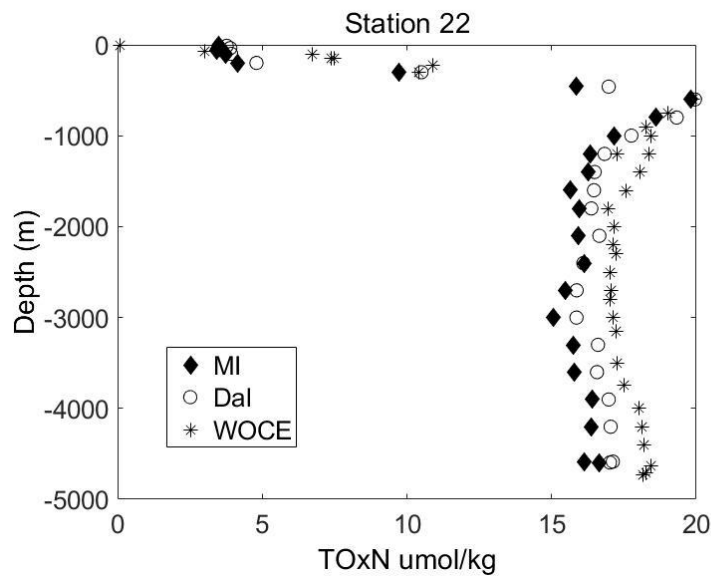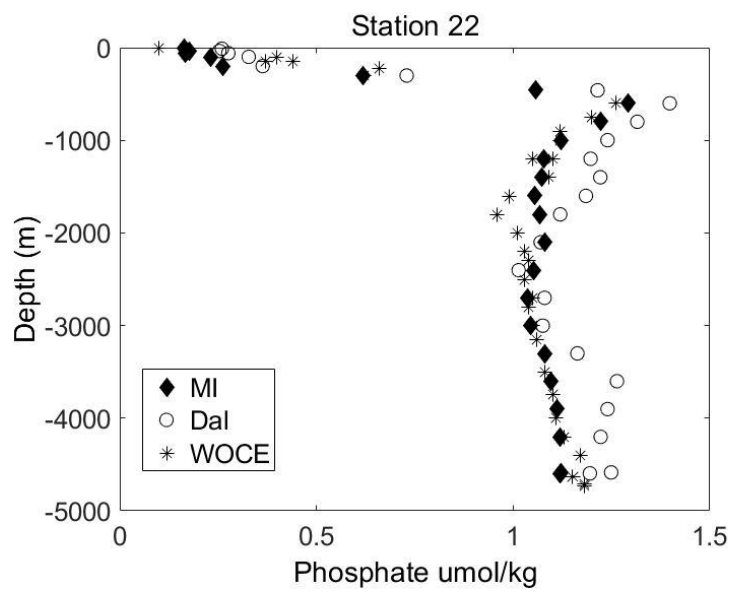

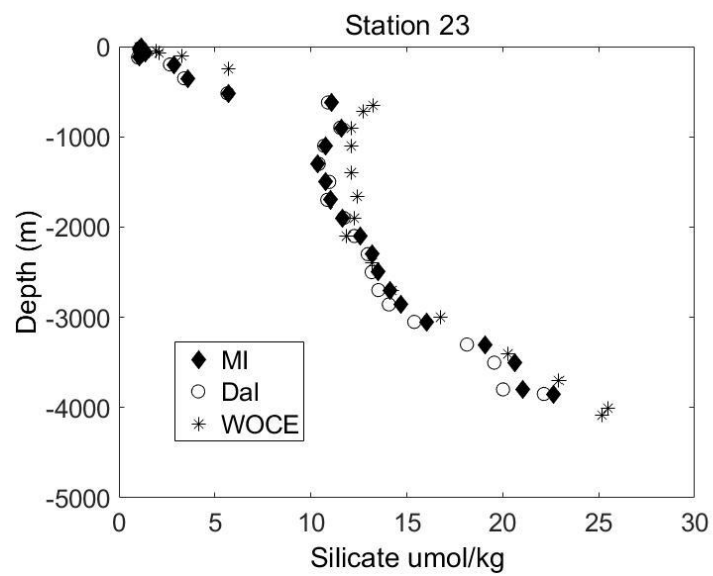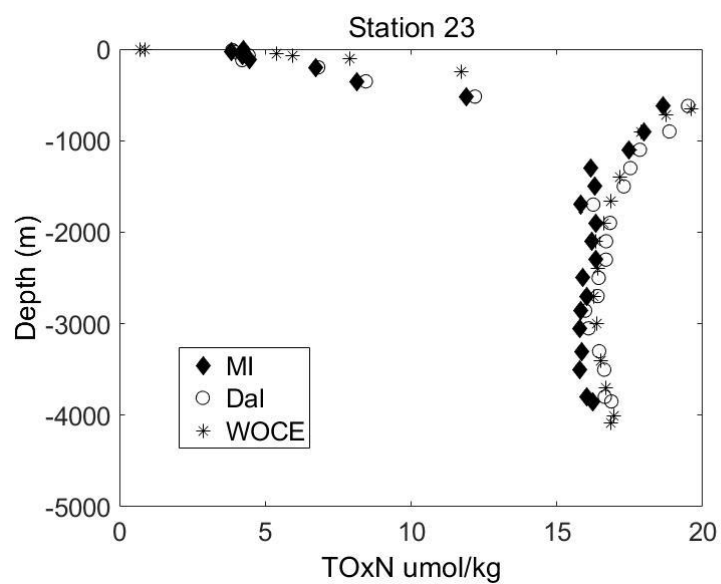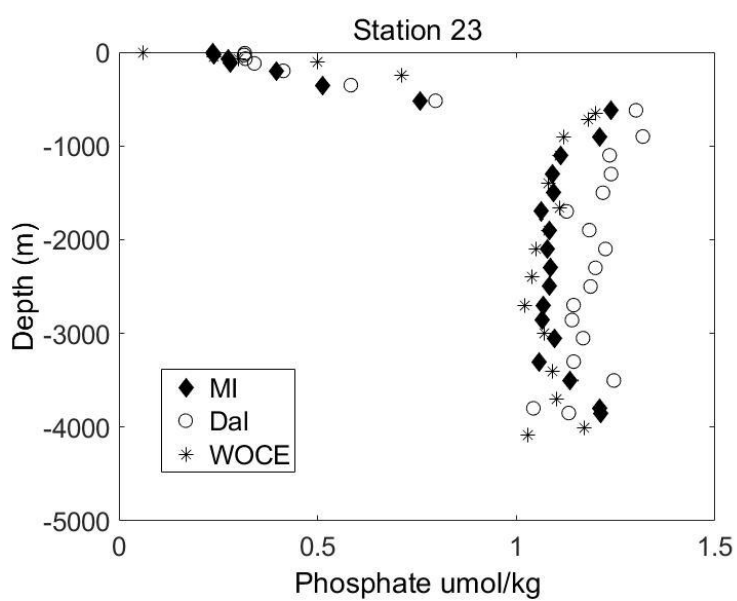

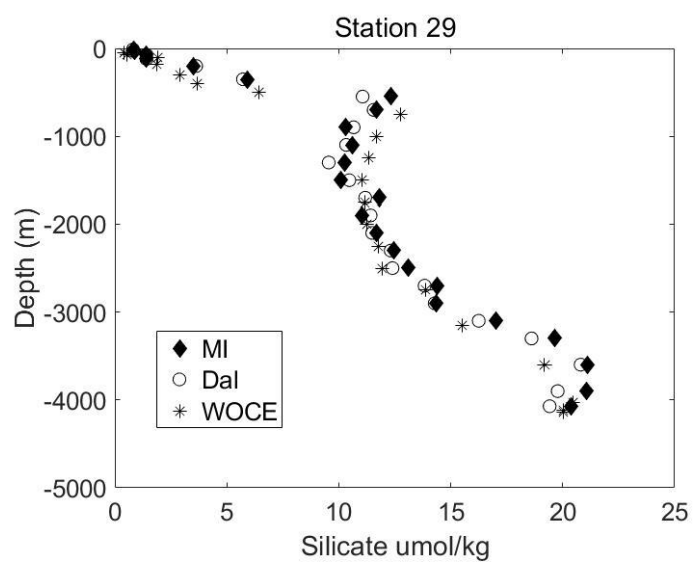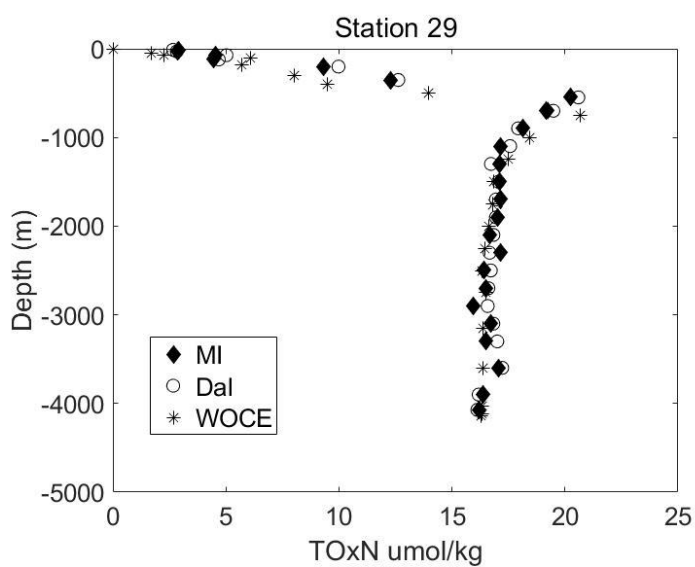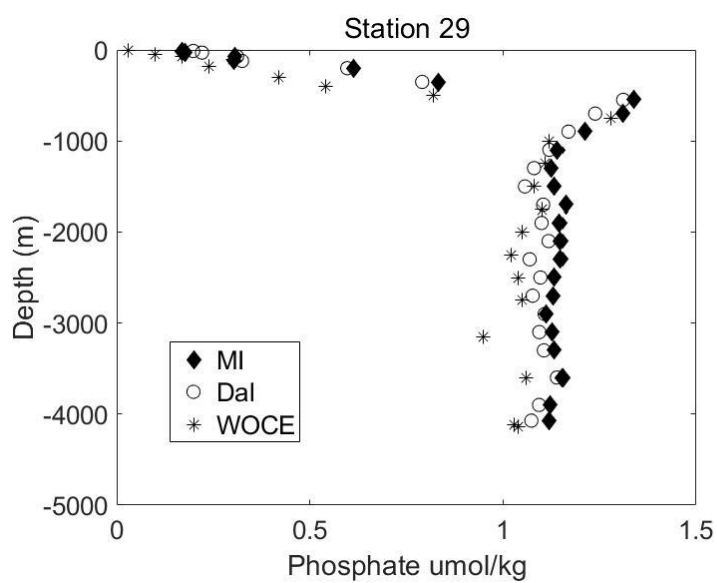

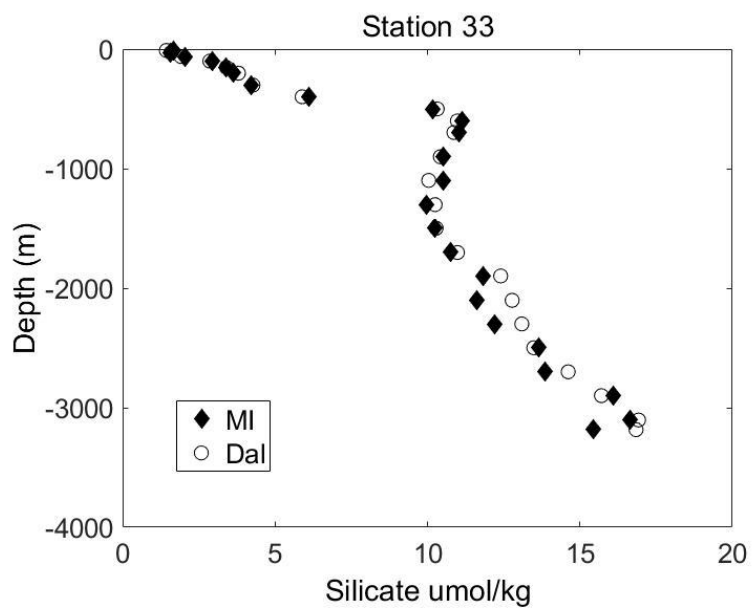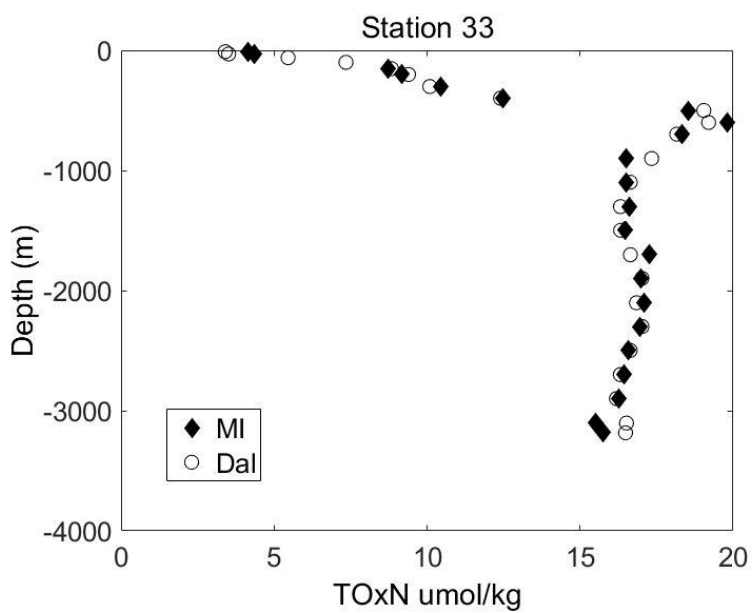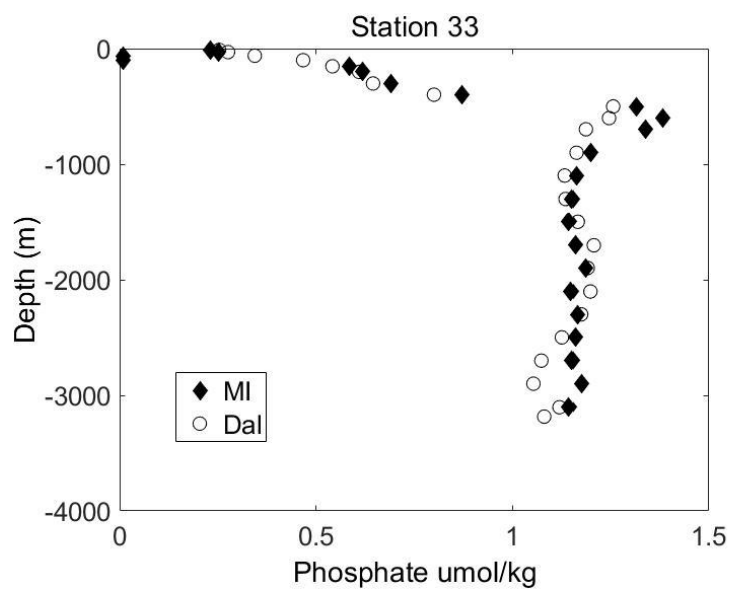

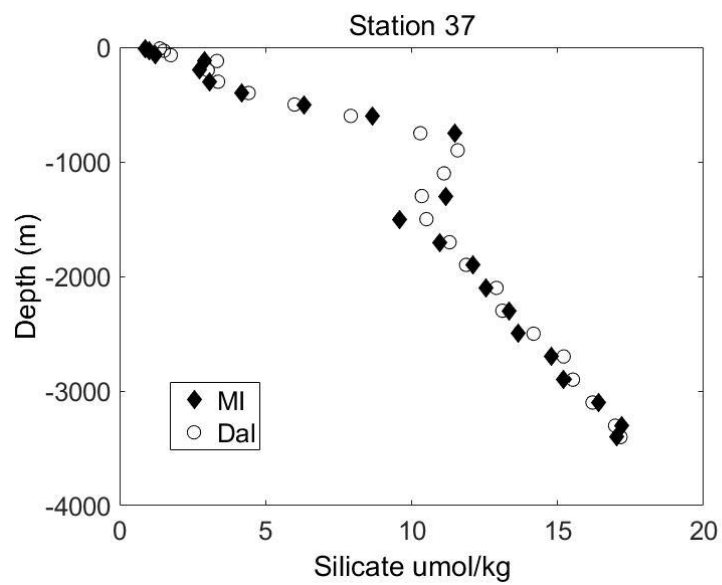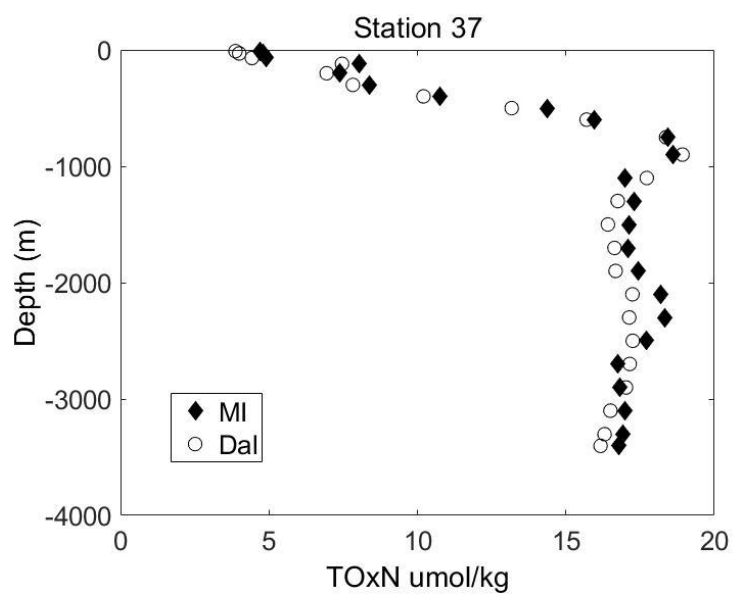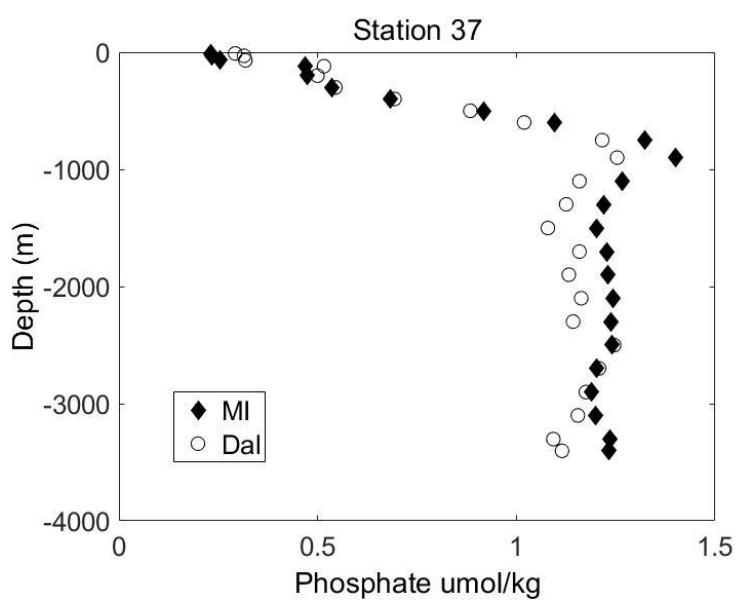



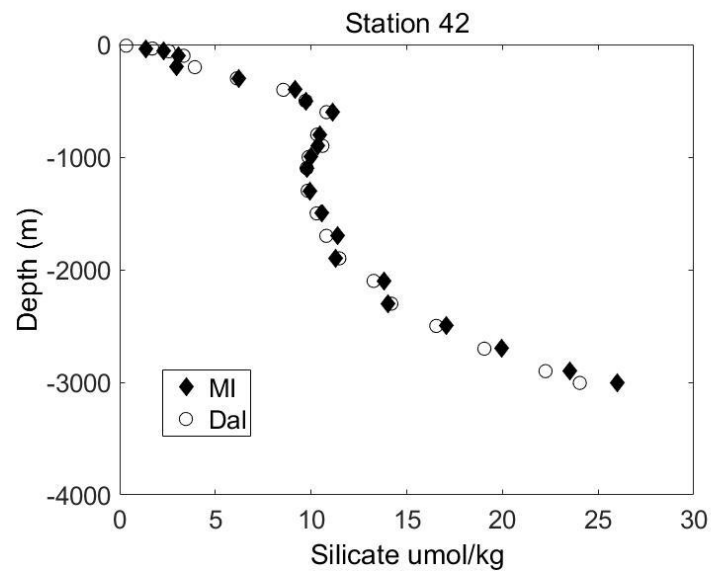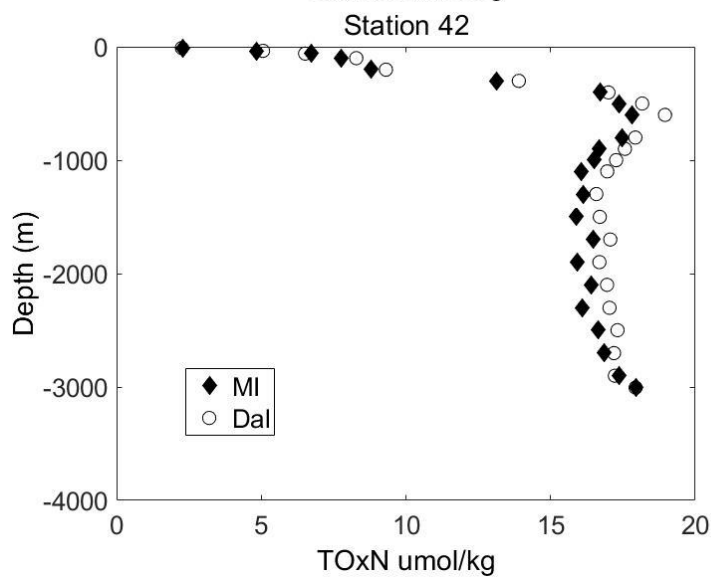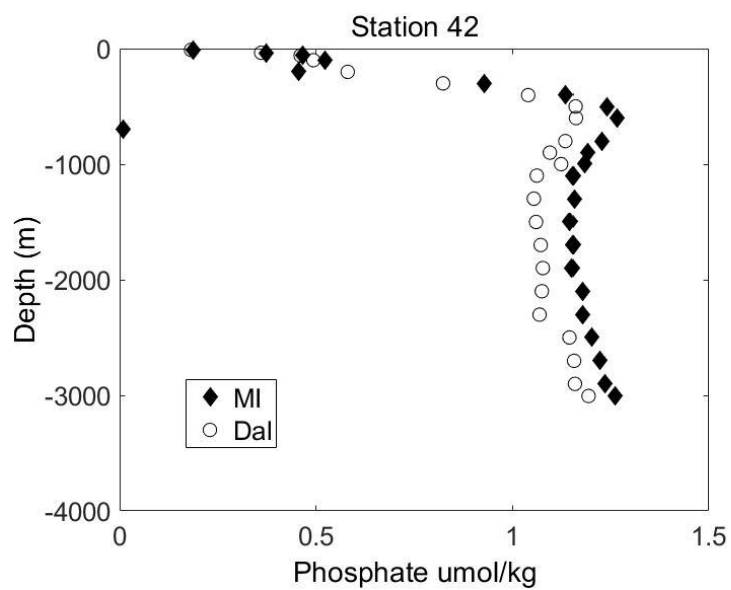

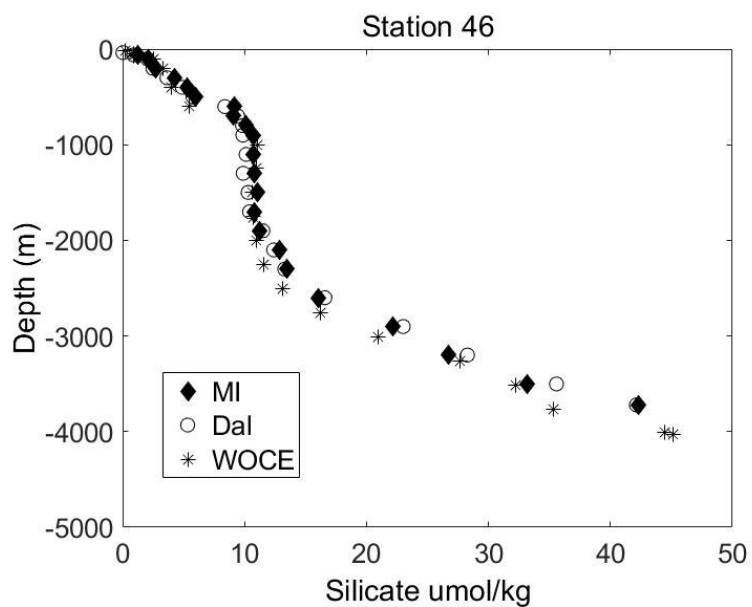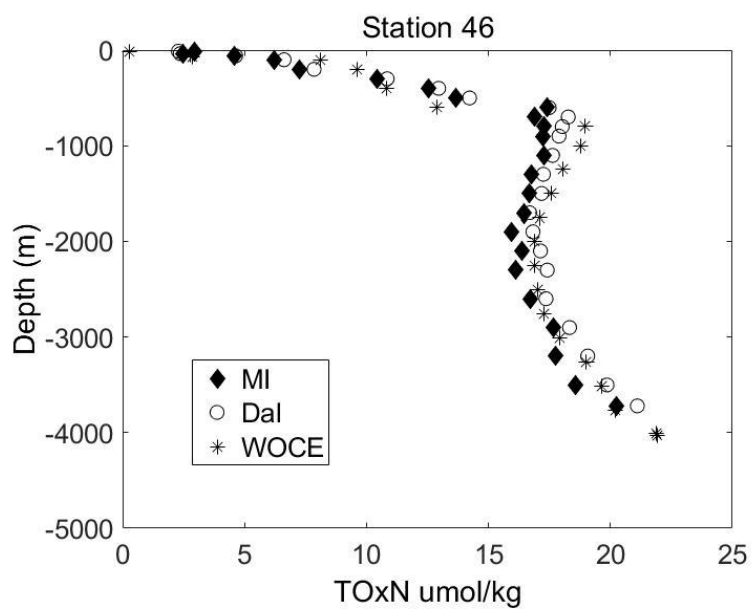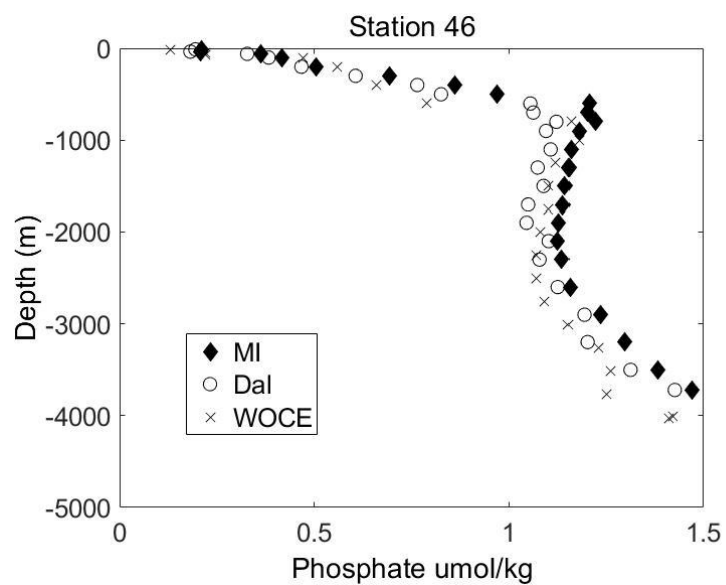

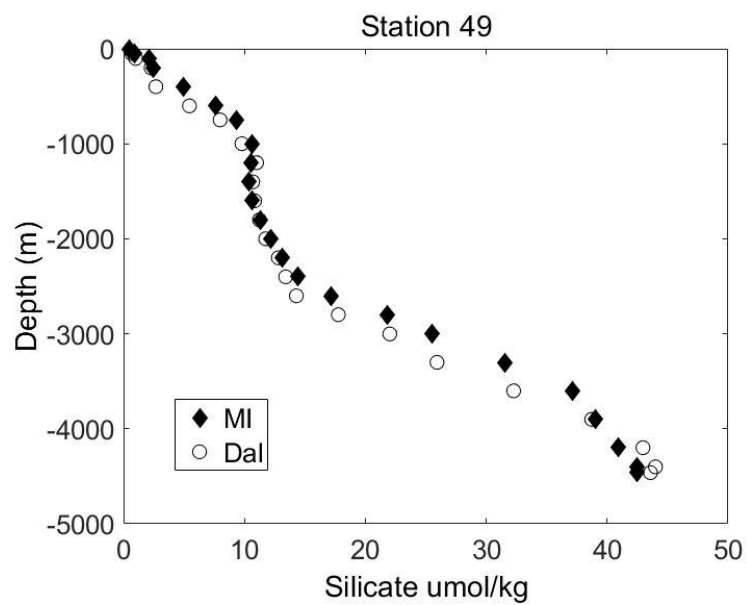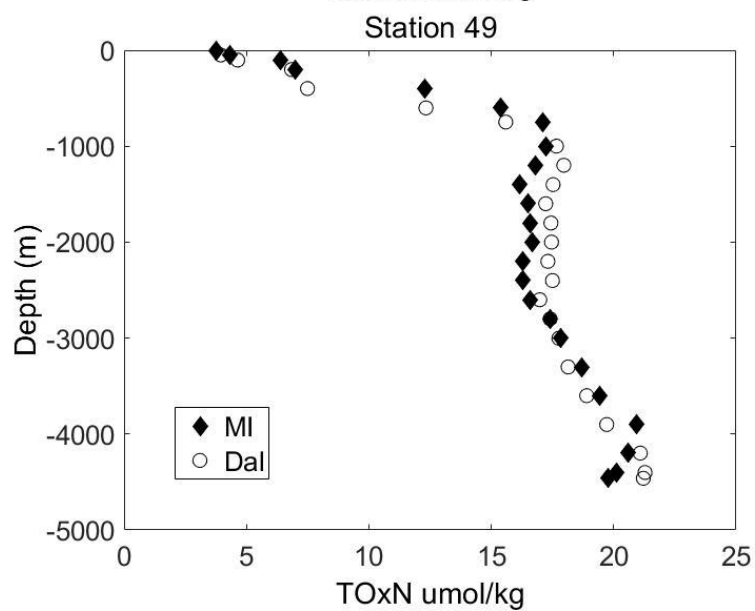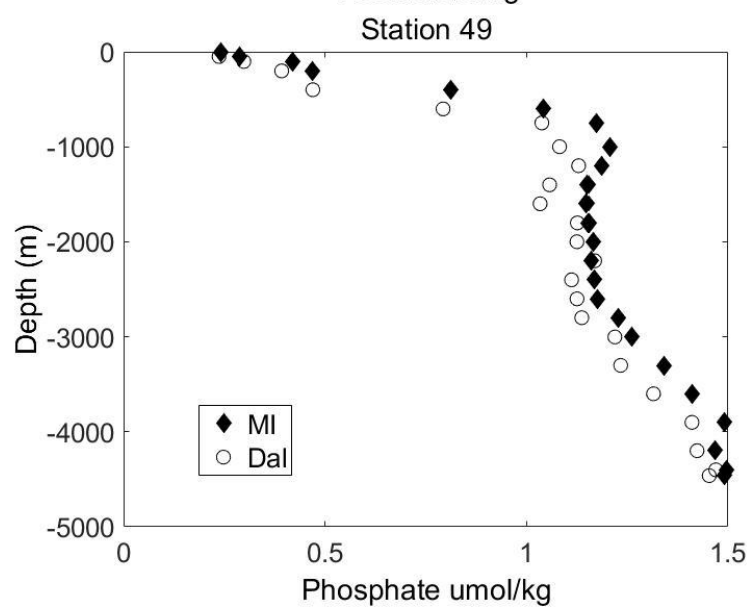

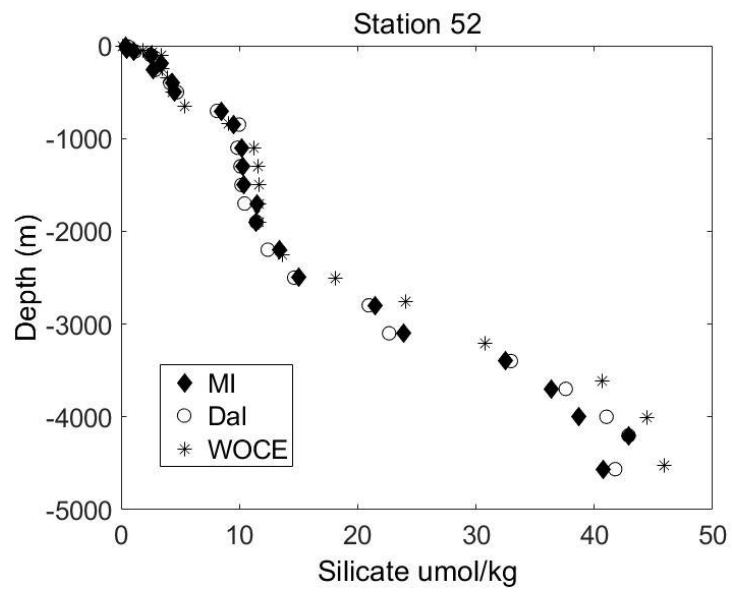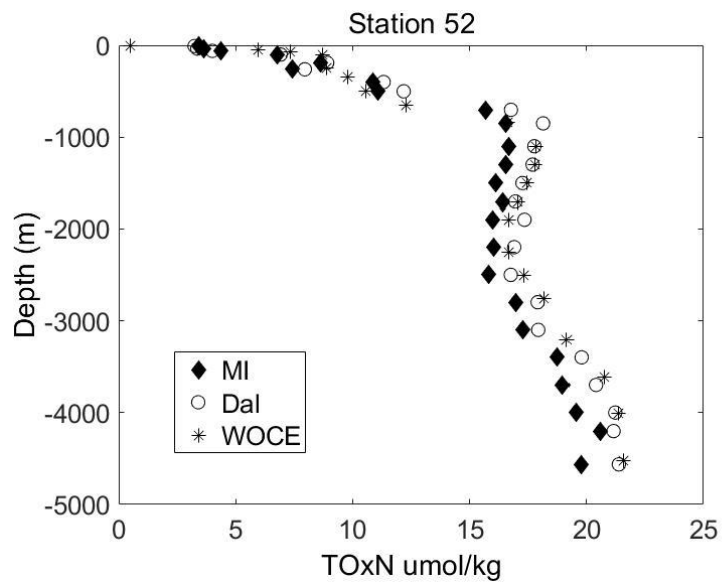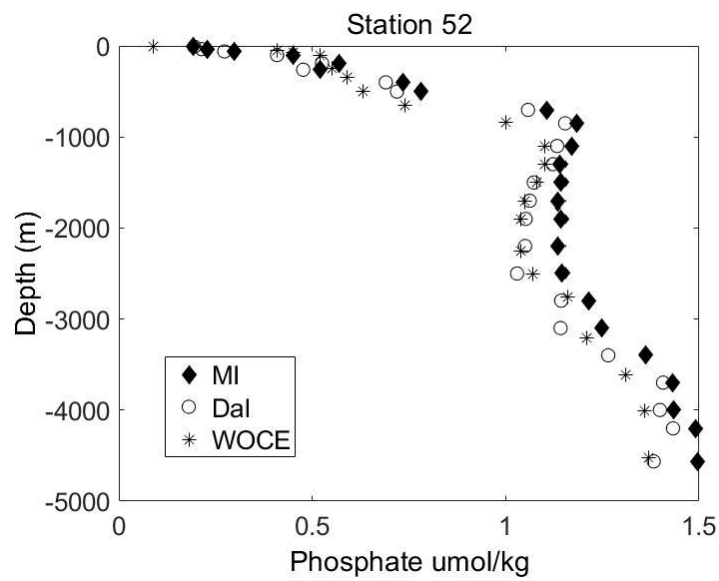

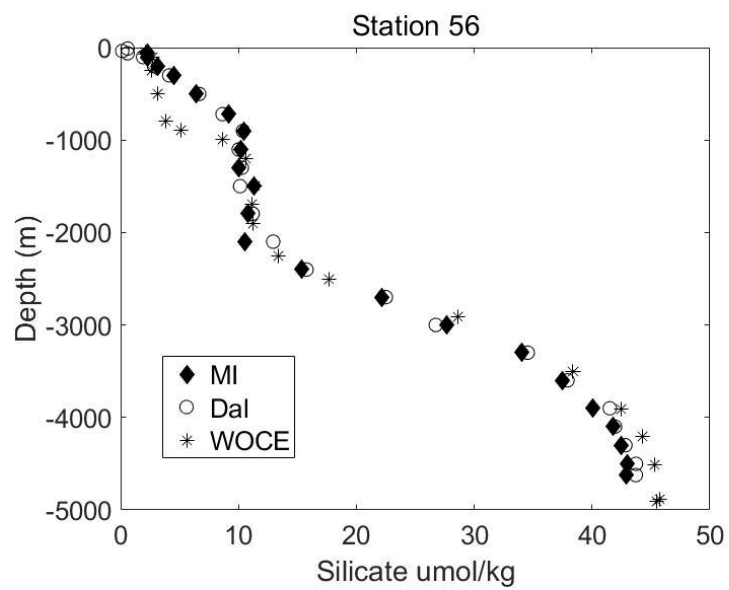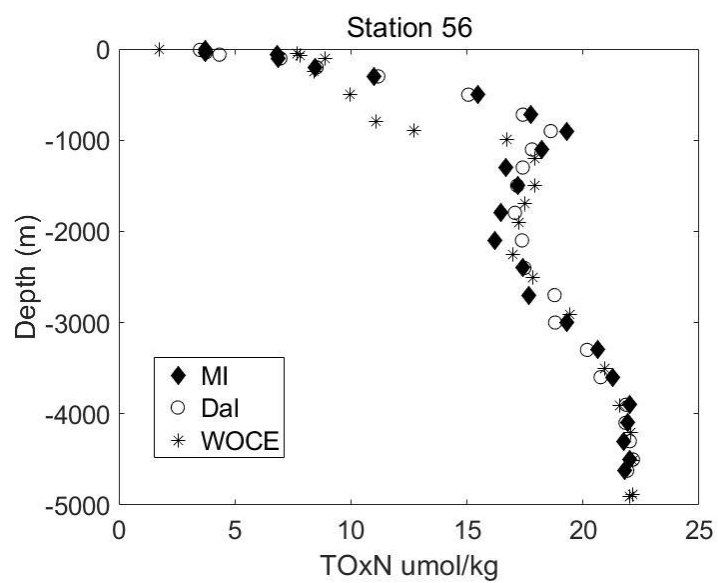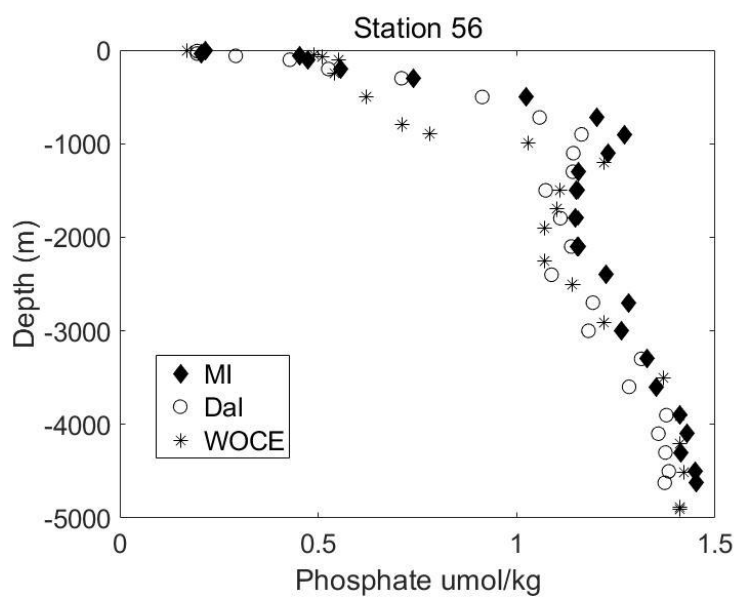

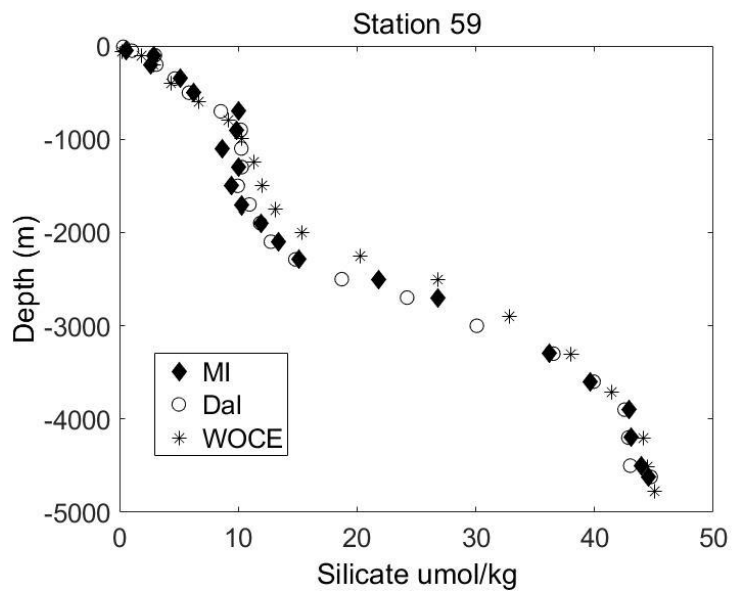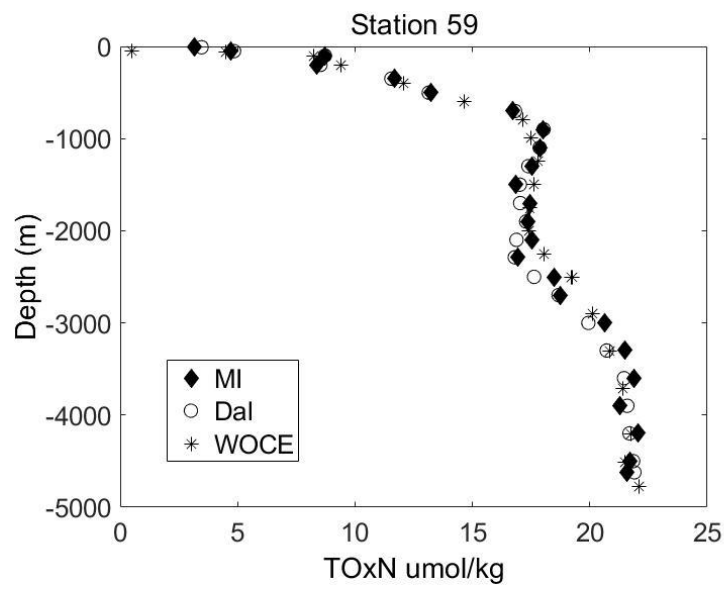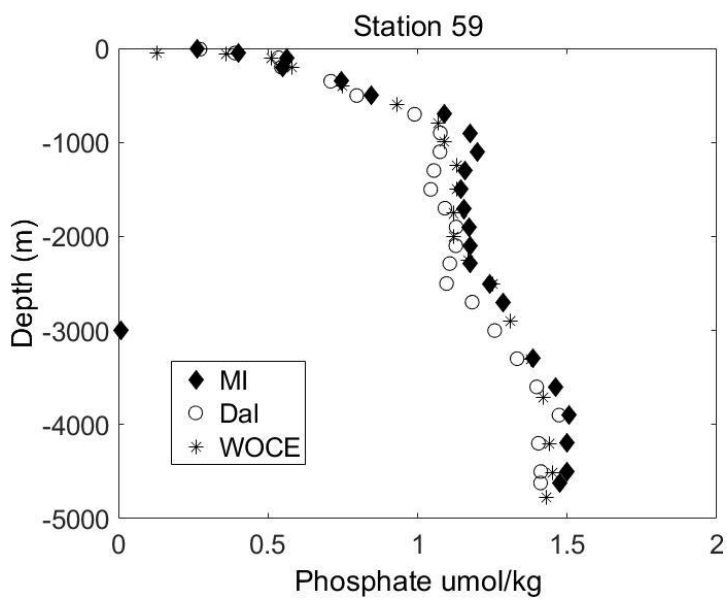

Figure S1. Vertical profiles of silicate, total oxidised nitrogen and phosphate from the MI (Marine Institute), Dal (Dalhousie University) and WOCE (World Ocean Circulation Experiment) datasets. Some stations do not have WOCE data as not every station was repeated at the exact same position in 2017 relative to 1997.

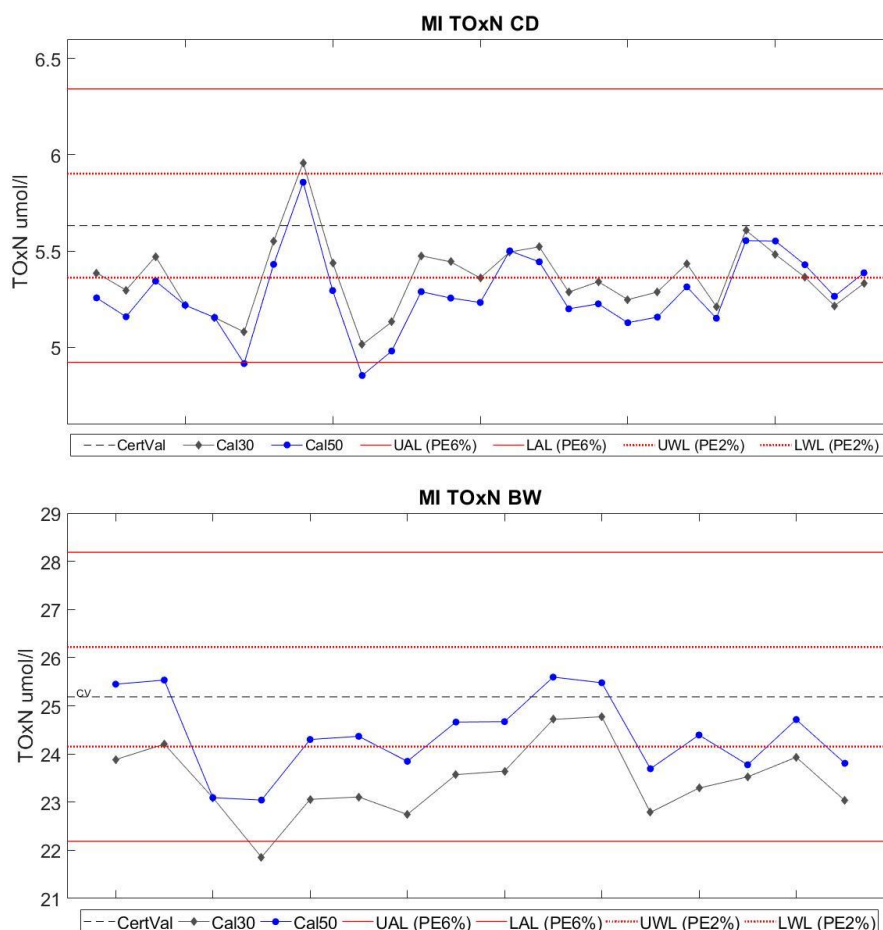

Figure S2 (a) and (b) Measured values for TOxN CD and BW CRMs on the MI system during the A02 survey to illustrate the effects of different calibration ranges – 0-30  $\mu\text{mol L}^{-1}$  (Cal30) and 0-50  $\mu\text{mol L}^{-1}$  (Cal50) where CertVal is the certified value of each CRM and UAL and LAL, are the upper and lower action limits using a z-score of 2 criteria and a potential error (PE%) of 6%. UWL and LWL are the upper and lower warning limits, respectively, calculated with a potential error (PE%) of 2%. Each point represents CRM results from an individual run. Due to improved QC using the TOxN range 0-50  $\mu\text{mol L}^{-1}$ , the runs were re-calculated to include the higher standards.
